# Supplementary material for: Smilax glabra Roxb. Inhibits Collagen Induced Adhesion and Migration of PC3 and LNCaP Prostate Cancer Cells through the Inhibition of Beta 1 Integrin Expression
Source: PubMed Central journal article supplement (PMC7411785; doi:10.3390/molecules25133006), 2020-06-30
Supplement: molecules-25-03006-s001.pdf [file molecules-25-03006-s001.pdf]

1

2 **1. Supplementary Results**

3

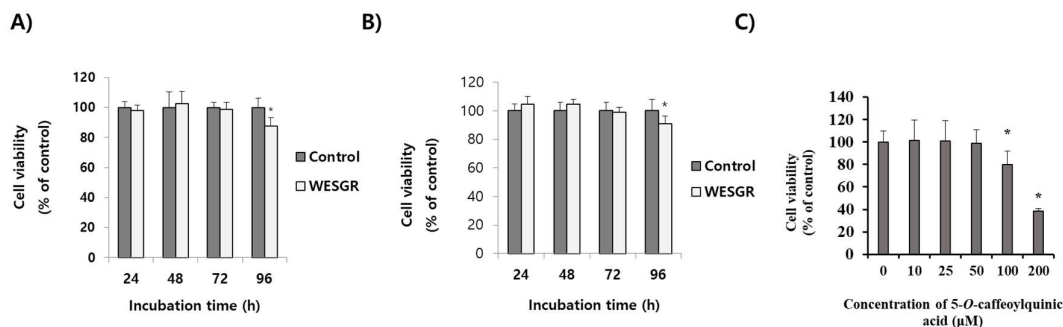

12 **Supplementary figure 1.** Cytotoxicity of WESGR or 5-O-caffeoylquinic acid on PC3 (A, C) and LNCaP (B) prostate cancer cells. WESGR (100 µg/mL for PC3 and 50 µg/mL for LNCaP) did not affect the viability of PC3 and LNCaP cells until 72 h of incubation. Various concentrations of 5-O-caffeoylquinic acid was administered to PC3 cells for 24 h and the viability was estimated with a WST-1 assay kit. All values are expressed as the mean ± standard deviation (SD) of three wells. \* indicate significant differences compared to the control (untreated); \* = p < 0.05.

13

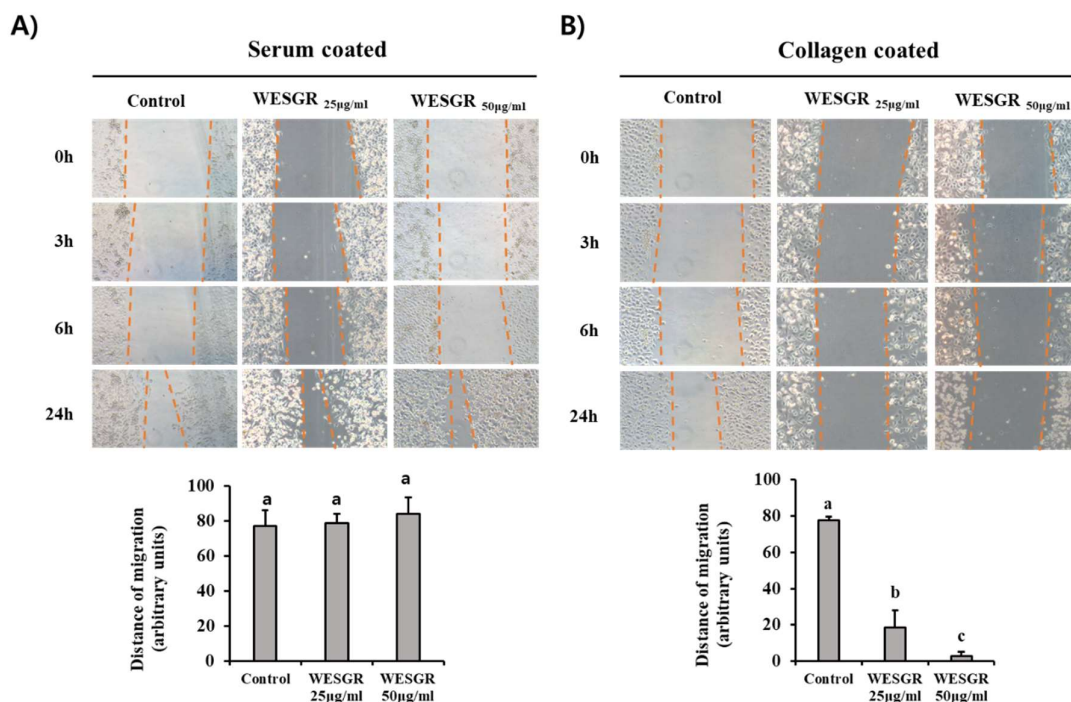

15 **Supplementary figure 2.** PC3 cells were seeded on the serum (A) or collagen (B) coated plate  
 16 and then treated with and without WESGR. After treatment, PC3 cells were subjected to the  
 17 scratch wound assay. The distance of the migration was measured using Image J program at 24h  
 18 after a cratch wound was introduced. Migration of PC3 cells on serum coated plate did not  
 19 affected by WESGR treatment. However, WESGR treatment attenuated the migration of PC3  
 20 cells on collagen coated plate. The upper panel is representative images and the lower panel  
 21 shows the quantification graph of the relative migration distance. All values are expressed as  
 22 the mean  $\pm$  standard deviation (SD) of triplicate measurements. Different letters indicate  
 23 significant differences ( $p < 0.05$ ).

24

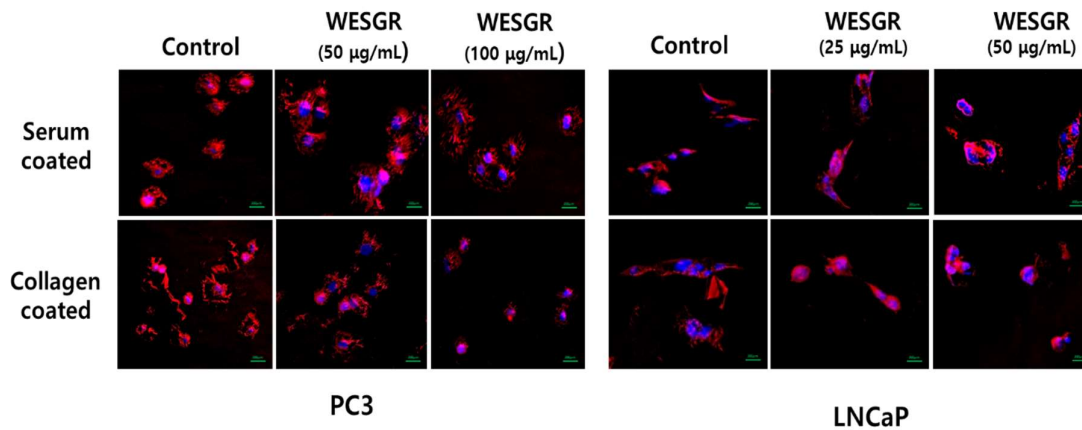

25

26 **Supplementary figure 3.** Treatment of WESGR attenuated collagen induced actin formation of  
 27 PC3 and LNCaP cells. PC3 and LNCaP cells were pretreated with and without WESGR for 6 h  
 28 and then seeded on serum or collagen coated cover glass. After further incubation for 30 min  
 29 (PC3) or 3 h (LNCaP) at 37 °C in a CO<sub>2</sub> incubator, cells were fixed with 4% paraformaldehyde  
 30 and then stained with Hoechst 33342 (blue) (Invitrogen, Carlsbad, CA, USA) and  
 31 Tetramethylrhodamine-5-isothiocyanate (TRITC)-conjugated phalloidin (red) (Merck Millipore  
 32 , Middlesex County, MA, USA) for 2 h at room temperature. Cells were washed twice with PBS,  
 33 fluorescence images were taken with a confocal laser scanning microscope (Nikon, Tokyo,  
 34 Japan).

35

36

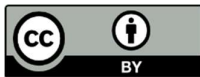

© 2020 by the authors. Submitted for possible open access publication under the terms and conditions of the Creative Commons Attribution (CC BY) license (<http://creativecommons.org/licenses/by/4.0/>).

37

38
